# Supplementary material for: Comparison of temperature dependent calibration methods of an instrument to measure OH and HO 2 radicals using laser-induced fluorescence spectroscopy
Source: Copernicus journal article supplement (doi:10.5194/amt-2023-123), 2023-06-15
Supplement: Supplementary file 1 [file amt-2023-123-supplement.pdf]

1 **Comparison of temperature dependent calibration methods**  
2 **of an instrument to measure OH and HO<sub>2</sub> radicals using**  
3 **laser-induced fluorescence spectroscopy**

4 **Frank A. F. Winiberg<sup>1,2</sup>, William J. Warman<sup>1</sup>, Charlotte A. Brumby<sup>1</sup>, Graham**  
5 **Boustead<sup>1</sup>, Iustinian G. Bejan<sup>1,3</sup>, Thomas H. Speak<sup>1</sup>, Dwayne E. Heard<sup>1</sup>, Daniel**  
6 **Stone<sup>1</sup> and Paul W. Seakins<sup>1</sup>**

7 [1] School of Chemistry, University of Leeds, Leeds, LS2 9JT, United Kingdom

8 [2] Now at: NASA's Jet Propulsion Laboratory, California Institute of Technology, Pasadena,  
9 91109, USA

10 [3] Now at: Faculty of Chemistry and "Integrated Centre for Environmental Science Studies in  
11 the North-East Development Region – CERNESIM", "Al. I. Cuza" University of Iasi, Romania

12

13 **Supplementary Information**

14 **Contents**

15 S1 HIRAC Temperature Profiles

16 S2 Hydrocarbon Calibration plot

17 S3 Further analysis of uncertainties in determination of  $F_{184.9\text{ nm}}$  for flowtube calibration

18 S4 Relative rate plot to demonstrate removal by OH

19 S5 Temperature dependence of various components of  $S_{\text{HOx}}$

20 S6 References

# 1 S1 HIRAC Temperature Profiles

2 Figure S1(a) shows the square tubes that were welded to the side of the HIRAC chamber during  
3 construction. Every fourth tube was connected together to provide four separate circulation  
4 pathways to minimize pressure drops and temperature variations. The four pathways were  
5 connected to the thermostat unit (Huber 690W) via an inlet manifold (Figure S1(b)). The  
6 resultant temperature gradients are shown in Figure S2.

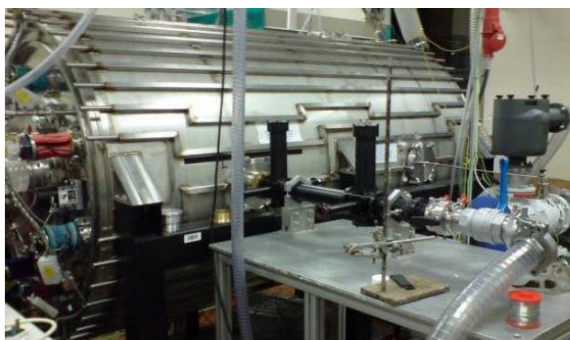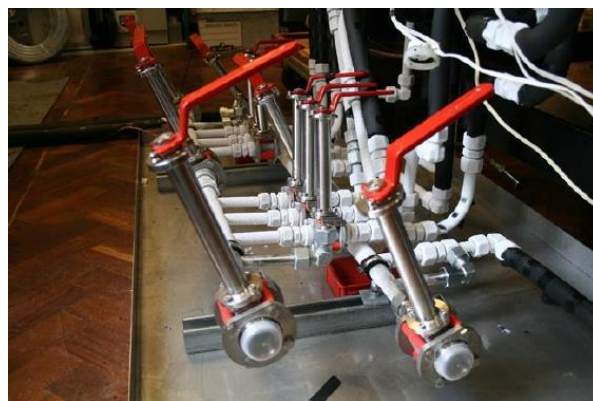

**Figure S1(a):** Square section tubing welded to the side of the HIRAC chamber

**Figure S1(b):** Inlet manifold to divert the fluid from the thermostat into 4 separate circulation pathways.

7

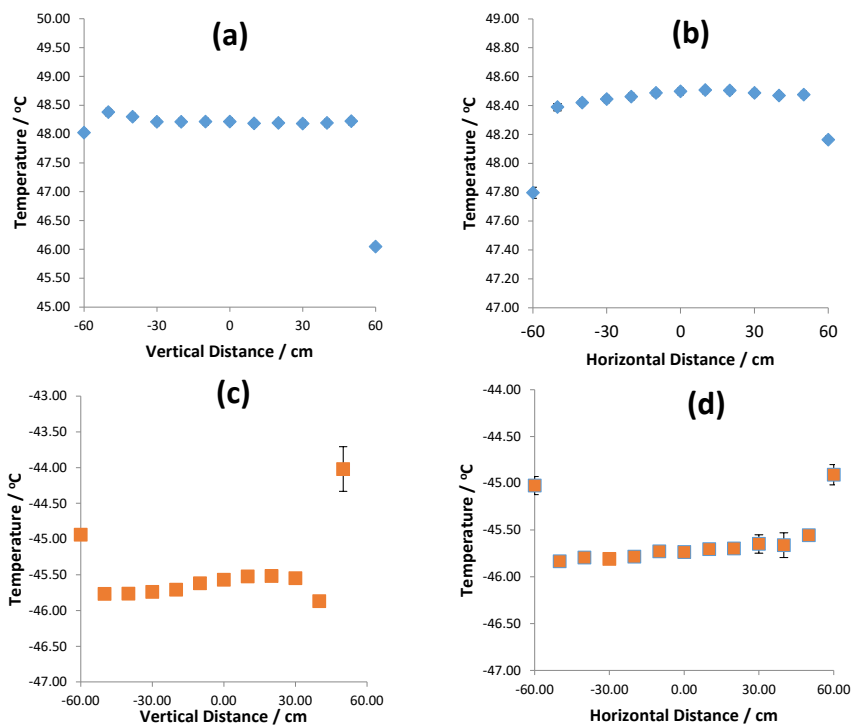

8

9 **Figure S2:** Temperature gradients measured across HIRAC at +48°C (a + b) and -46°C (c + d)  
10 at 1000 mbar.

## 1 S2 Hydrocarbon Calibration Plots

2 Accurate concentrations of the hydrocarbon(s) are required for the alternative calibration of  
3 OH. Sequential additions of a known concentration of hydrocarbon were introduced into the  
4 HIRAC chamber. The signal was measured on the mass spectrometer as shown in Figure S3a  
5 for cyclohexane (monitored at  $m/z = 84.16$  using  $N_2^+$  as the ionization source). Figure S3b  
6 shows the resulting calibration plot.

7

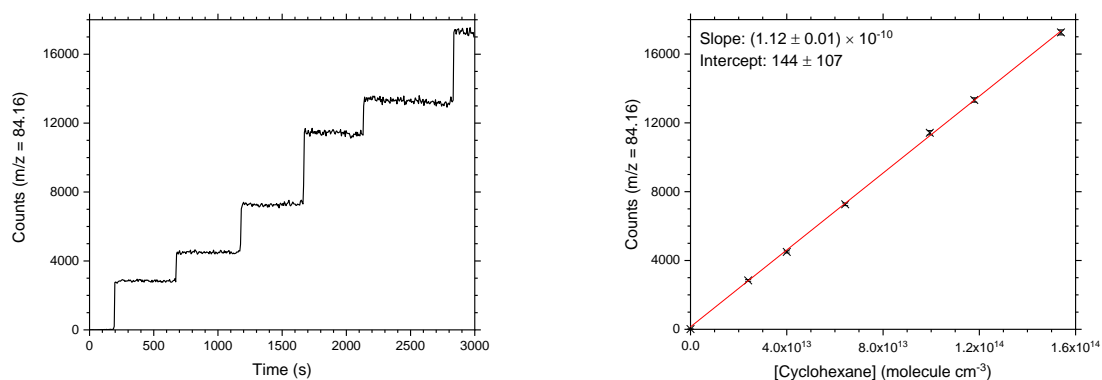

8 **Figure S3(a):** PTR signal as a function of additions of cyclohexane. **Figure S3(b):** Corresponding calibration plot.

8

1 **S3 Further investigation of uncertainties in determination of  $F_{184.9 \text{ nm}}$  for flowtube**  
 2 **calibration**

3 A schematic of the flowtube calibration set up is shown in Figure S4. The calculated [HOx] for  
 4 the conventional flowtube calibration is given by equation E2 of the main manuscript:

$$5 \quad [\text{OH}] = [\text{HO}_2] = [\text{H}_2\text{O}] \sigma_{\text{H}_2\text{O}, 184.9 \text{ nm}} \Phi_{\text{OH}} F_{184.9 \text{ nm}} \Delta t \quad (\text{E2})$$

6 The uncertainties in the various components of E2 are given in Table 4 in the main text and it  
 7 can be seen that  $F_{184.9 \text{ nm}} \Delta t$ , the photon flux of the lamp is the major uncertainty.  $F_{184.9 \text{ nm}}$  can  
 8 be determined in several ways, but most instruments use the photolysis of  $\text{N}_2\text{O}$ , with  
 9 measurement of the absolute amount of NO produced using a trace chemiluminescence  
 10 analyser as the method of choice. The reactions leading to NO are given below:

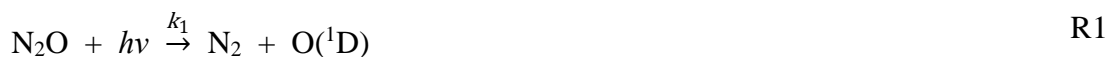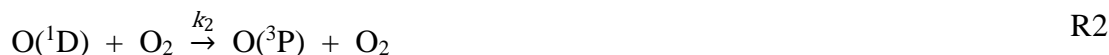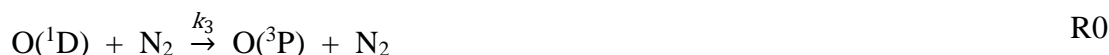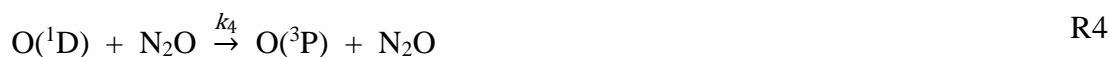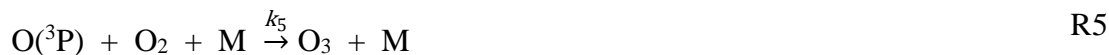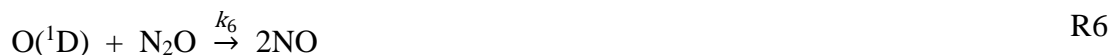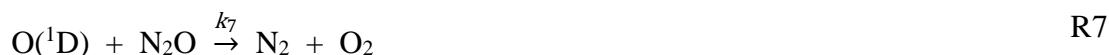

11 Following the reactions described above,  $F_{184.9 \text{ nm}}$  can be determined following equation ES1:

$$F_{184.9 \text{ nm}} \Delta t = \frac{(k_2[\text{O}_2] + k_3[\text{N}_2] + (k_7 + k_6)[\text{N}_2\text{O}])[\text{NO}]}{2(k_6 \sigma_{\text{N}_2\text{O}} \Phi_{\text{O}({}^1\text{D})})[\text{N}_2\text{O}]^2} \quad \text{ES1}$$

12 where  $\Delta t$  is the irradiation time which can be calculated from the known dimensions of the  
 13 “wand” as a function of the total flow rate of gas through the “wand”,  $\phi_{\text{O}({}^1\text{D})}$  is the quantum  
 14 yield for the photodissociation  $\text{O}({}^1\text{D})$  ( $\sim 1$ ) and  $\sigma_{\text{N}_2\text{O}}$  is the absorption cross section of  $\text{N}_2\text{O}$  at  
 15 184.9 nm.  $\sigma_{\text{N}_2\text{O}}$  is taken from the literature as  $(1.43 \pm 0.02) \times 10^{-19} \text{ cm}^2 \text{ molecule}^{-1}$  (Creasey et  
 16 al., 2000). All the concentrations of species in ES1 are in molecule  $\text{cm}^{-3}$ .

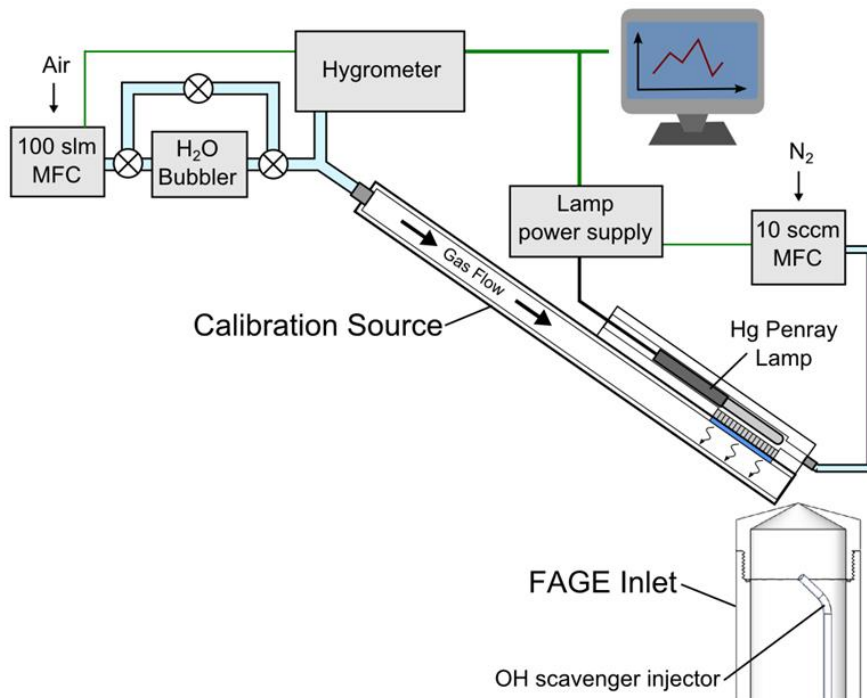

1  
2 **Figure S4:** Schematic of flowtube calibration source.

3  
4 Various experiments and procedures have been undertaken to check the reproducibility and  
5 uncertainty in the determination of  $F_{184.9\text{ nm}}$ .

6 (a) NOx analysers – Actinometry determinations require a measurement of the NO produced;  
7 as [NO] is at relatively low levels, it is important to have an analyser of the appropriate  
8 sensitivity. Chemiluminescence analysers will also show a small negative response to N<sub>2</sub>O and  
9 therefore it is important to calibration for this, see Figure S5a.

10

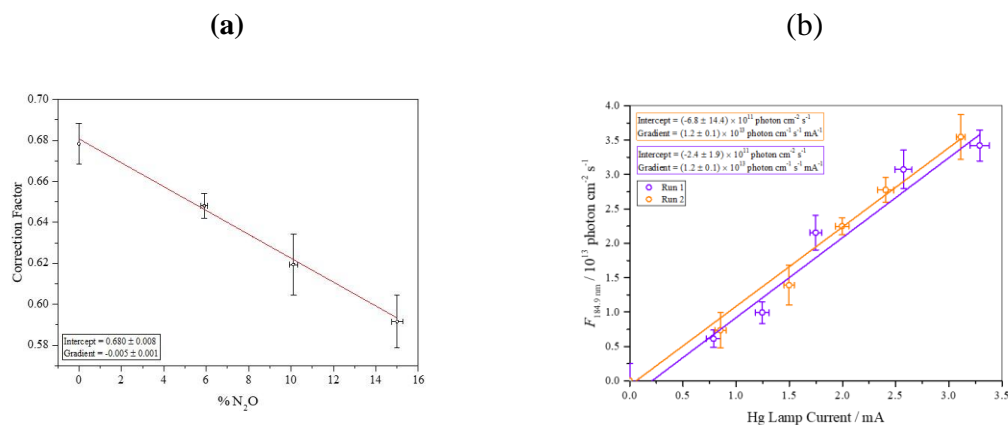

11 **Figure S5:** (a) Typical response of the NOx analyser calibration factor to N<sub>2</sub>O. (b) Variation in  
12 actinometry plot with N<sub>2</sub>O passed through a Sofnofil trap (Run 1) and by-passing the trap (Run 2).

1 With regular calibration of the analysers the values of  $F_{184.9 \text{ nm}}$  were within experimental error  
2 for each of the analysers used.

3

4 (b) Impurities in the  $\text{N}_2\text{O}$  – Two actinometry calculations were undertaken passing or by-  
5 passing the  $\text{N}_2\text{O}$  (BOC, medical grade) through a Sofnofil trap to remove NO and  $\text{NO}_2$ . As can  
6 be seen in Figure S5(b) there is only a slight difference in the intercepts of the plot of  $F_{184.9 \text{ nm}}$   
7 vs lamp current (errors overlap) and no difference in the linearity of the plot.

8

9 (c) Lamp power supplies and software analysis – Actinometry plots produced identical  
10 gradients and intercepts (within errors) with different lamp power supplies and with different  
11 versions of software analysis.

12

13 Overall eight actinometry evaluations produced a mean value of  $(1.07 \pm 0.09) \times 10^{13}$  photon  
14  $\text{cm}^{-1} \text{ s}^{-1} \text{ mA}^{-1}$  where the error is the  $1\sigma$  statistical variation in the eight values. The overall  
15 accuracy depends on the rate coefficients in equation ES1. These have undergone evaluations  
16 by both IUPAC and JPL and despite extensive study have uncertainties in the region of 8 –  
17 10%. Table S1 summarizes the various components of uncertainty in  $F_{184.9 \text{ nm}}$ .

18

19 **Table S1:** Contributions to uncertainties in  $F_{184.9 \text{ nm}}$

| Parameter              | Uncertainty |
|------------------------|-------------|
| Flows                  | 2%          |
| $k_2$                  | 9%          |
| $k_3$                  | 8%          |
| $k_6$                  | 10%         |
| $k_7$                  | 10%         |
| Precision              | 8%          |
| $F_{184.9 \text{ nm}}$ | <b>20%</b>  |

20

#### 1 S4 OH Relative rate plot to demonstrate removal by OH

2 An important aspect to the alternative hydrocarbon analysis to determine OH sensitivity is that  
3 the hydrocarbon is only chemically removed by OH and not any other oxidizing species. If  
4 applicable first order dilution terms can be accounted for in the analysis. Figure S6 shows a  
5 relative rate plot carried out under identical conditions to the hydrocarbon analysis, but with  
6 no FAGE sampling and hence minimal dilution. The observed gradient of the plot  $0.923 \pm$   
7  $0.010$  (where the error in the gradient is statistical at the  $2\sigma$  level), which represents the ratio  
8 of the bimolecular rate coefficients, is in good agreement with the calculated literature ratio of  
9  $0.97 \pm 0.14$ , where the error is based on a 10% error in each bimolecular rate coefficient.

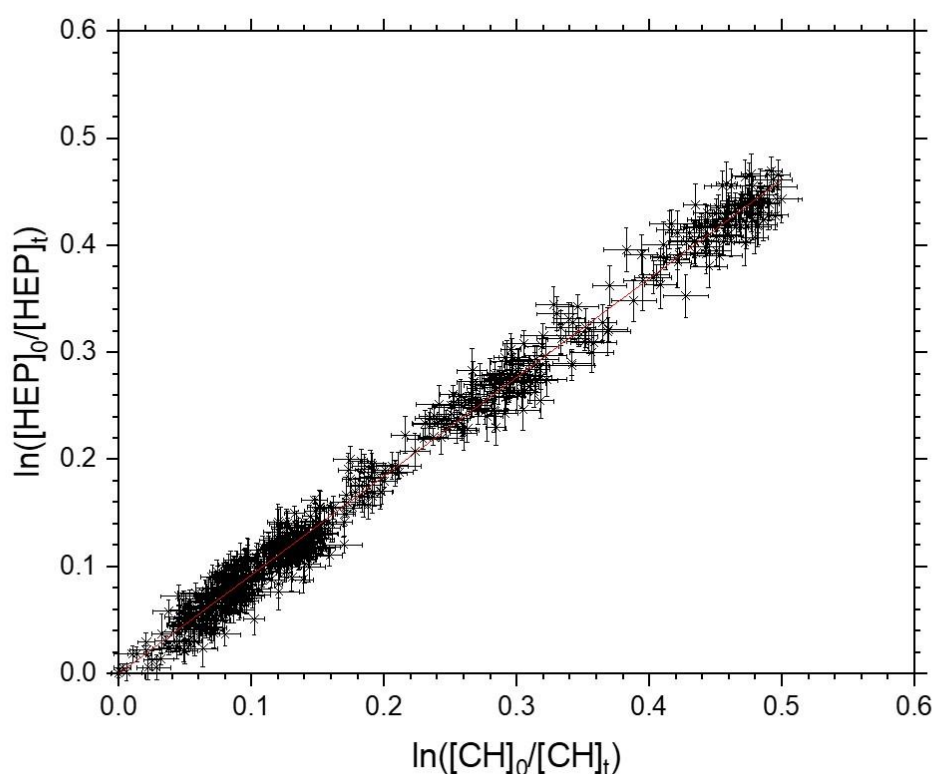

10

11 **Figure S6:** Relative rate plot of heptane (HEP) and cyclohexane (CH) to demonstrate that chemical  
12 removal is consistent with removal by OH.

## 1 S5 Temperature Dependence of Various Components of $C_{HOx}$

2 The temperature dependence of the  $C_{HOx}$  factor depends on several factors as introduced in  
3 the main text. These are: (1) Variation in the number density in the observation cell due to the  
4 temperature difference between the gas in the observation cell and the gas temperature at  
5 which [OH] is calculated, either in the flowtube or the HIRAC chamber. (2) Variation in  
6 fluorescence quenching. Both the quenching rate coefficient and [Q] have a negative  
7 temperature dependence, so that the fluorescence quantum yield will increase with increasing  
8 temperature. (3) Variation in the relative population of the probed ro-vibrational state. (4)  
9 Variation in the transmission of HOx through the FAGE pinhole and inlet tube. An estimate  
10 of the losses through the flowtube could be estimated by looking at the variation in signal  
11 with increased length of the inlet tube, but this would not account for losses at the pinhole.  
12 HOx transmission through the pinhole and FAGE inlet is expected to show a positive  
13 temperature dependence.

### 14 (a) Number Density

#### 15 *Conventional calibration with calibration air at 293 K*

16 There is a decrease in the OH number density due to the change in pressure between the  
17 sample, 1 bar, and the HOx cell, typically ~ 3 mTorr. However, this ratio will not be constant  
18 over the variation in inlet temperature as the temperatures of the HOx cells will vary. The  
19 correction factor, summarized for both OH and HO<sub>2</sub> cells in Table S2 is given by:  $\frac{293}{T_{HOx}}$ .

20

21 **Table S2:** Correction for change in number density relative to 293 K

| $T_{ext}/K$ | $T_{OH}/K$ | Correction factor OH | $T_{HO_2}/K$ | Correction factor HO <sub>2</sub> |
|-------------|------------|----------------------|--------------|-----------------------------------|
| 266         | 279        | 1.043                | 284          | 1.025                             |
| 276         | 285        | 1.021                |              |                                   |
| 293         | 293        | 1.000                | 293          | 1.000                             |
| 308         | 301        | 0.967                | 297          | 0.980                             |
| 323         | 308        | 0.945                | 302          | 0.964                             |
| 343         | 319        | 0.912                | 308          | 0.945                             |

22

#### 23 *Conventional calibration with calibration air matched to $T_{Ext}$ via flowtube or HIRAC*

24 In these modes there is a smaller correction as the cell temperature is much closer to  $T_{Ext}$ , the  
25 temperature at which [OH] is calculated either from the conventional flowtube calibration or



1 via the alternative kinetics based calibrations in the HIRAC chamber. The correction factor,  
 2 summarized in Tables S3 and S4, is given by:  $\frac{T_{Ext}}{T_{HOx}}$ .

3

4 **Table S3:** Correction for change in number density relative to  $T_{Ext}$  via flowtube calibration

| $T_{Ext}/K$ | $T_{OH}/K$ | Correction factor OH | $T_{HO2}/K$ | Correction factor HO <sub>2</sub> |
|-------------|------------|----------------------|-------------|-----------------------------------|
| 276         | 278        | 0.993                |             |                                   |
| 278         | 280        | 0.993                | 287         | 0.969                             |
| 293         | 293        | 1.000                | 293         | 1.000                             |
| 323         | 320        | 1.009                | 301         | 1.073                             |
| 343         | 338        | 1.015                |             |                                   |

5

6 **Table S4:** Correction for change in number density relative to  $T_{Ext}$  via HIRAC calibrations

| $T_{Ext}/K$ | $T_{OH}/K$ | Correction factor OH | $T_{Ext}/K$ | $T_{HO2}/K$ | Correction factor HO <sub>2</sub> |
|-------------|------------|----------------------|-------------|-------------|-----------------------------------|
| 273         | 276        | 0.989                | 273         | 286         | 0.955                             |
| 293         | 293        | 1.000                | 293         | 293         | 1.000                             |
| 323         | 320        | 1.009                | 308         | 297         | 1.037                             |
| 348         | 341        | 1.021                | 323         | 302         | 1.070                             |
|             |            |                      | 343         | 308         | 1.114                             |

7

8 (b) Quenching and resultant changes in the fluorescence quantum yield

9 The degree of quenching of the excited OH will vary as a function of temperature. The  
 10 pseudo-first-order rate coefficient for OH quenching is given by  $k_q[Q]$  where  $k_q$  is the  
 11 bimolecular rate coefficient for quenching by N<sub>2</sub> (dominant quencher) and [Q] is the number  
 12 density of the quenchers (N<sub>2</sub>, O<sub>2</sub> and H<sub>2</sub>O). Table S5 shows the variation in the quenching  
 13 parameters where the temperature dependence of  $k_q$  is taken from Bailey et al. (1999); Bailey  
 14 et al. (1997). The fluorescence quantum yield,  $\Phi_f$ , is the ratio of the fluorescence rate  
 15 ( $k_f[OH^*]$ ) to the total rate of removal:

$$16 \quad \Phi_f = \frac{k_f[OH^*]}{k_f[OH^*] + k_q[OH^*][Q]} = \frac{k_f}{k_f + k_q[Q]} \quad \text{ES2}$$

17 The relative change in the fluorescence quantum yield is shown in the last column of Table S5.

1 **Table S5:** Relative temperature dependence of parameters controlling  $\Phi_f$

| $T_{\text{HOx}}/\text{K}$ | [Q] rel | $k_q$ rel | $k'$ rel | $\Phi_f$ rel |
|---------------------------|---------|-----------|----------|--------------|
| 281                       | 1.036   | 1.034     | 1.071    | 0.948        |
| 285                       | 1.021   | 1.021     | 1.042    | 0.968        |
| 290                       | 1.003   | 1.005     | 1.008    | 0.994        |
| 295                       | 0.986   | 0.988     | 0.975    | 1.020        |
| 300                       | 0.970   | 0.972     | 0.943    | 1.046        |
| 310                       | 0.939   | 0.940     | 0.882    | 1.100        |
| 317                       | 0.918   | 0.917     | 0.842    | 1.139        |
| 330                       | 0.882   | 0.875     | 0.772    | 1.214        |
| 338                       | 0.861   | 0.849     | 0.731    | 1.262        |

2

3 (c) Relative population of Q

4 The final parameter which can be calculated is the relative strength of the initial absorption  
 5 due to the change in the rotational population of the ground electronic state probed by the  
 6  $Q_1(2)$  transition, which will vary with temperature. The relative rotational population, shown  
 7 in Table S6 was calculated with the LIFBase programme. There is a slight decrease in  
 8 population as temperature increases.

9

10 **Table S6:** Variation in rotational population of probed state  $Q_1(2)$

| $T_{\text{HOx}}/\text{K}$ | Population (T) | Population relative to 293 K |
|---------------------------|----------------|------------------------------|
| 280                       | 0.206          | 1.035                        |
| 284                       | 0.204          | 1.025                        |
| 293                       | 0.199          | 1.000                        |
| 310                       | 0.193          | 0.970                        |
| 323                       | 0.187          | 0.940                        |
| 340                       | 0.181          | 0.910                        |

11

12 The overall calculated temperature dependence relative to 293 K, will be the product of the  
 13 three correction factors. The calculated temperature dependences from the different  
 14 calibration methods were obtained by taking the product at the highest and lowest  
 15 temperatures and assuming a linear temperature dependence. The reported values are  
 16 presented in Table 6 of the main manuscript.

17

## 18 **S6 References**

19 Bailey, A. E., Heard, D. E., Paul, P. H., and Pilling, M. J.: Collisional Quenching of OH by  $\text{N}_2$ ,  
 20  $\text{O}_2$  and  $\text{CO}_2$ , Journal of the Chemical Society, Faraday Transactions, 93, 2915-2920, 1997.

- 1 Bailey, A. E., Heard, D. E., Henderson, D. A., and Paul, P. H.: Collisional quenching of  
2 OH(A<sup>2</sup>Σ<sup>+</sup>, v'=0) by H<sub>2</sub>O between 211 and 294 K and the development of a unified model for  
3 quenching, Chem. Phys. Lett., 302, 132-138, 1999.
- 4 Creasey, D. J., Heard, D. E., and Lee, J. D.: Absorption cross-section measurements of water  
5 vapour and oxygen at 185 nm. Implications for the calibration of field instruments to measure  
6 OH, HO<sub>2</sub> and RO<sub>2</sub> radicals, Geophysical Research Letters, 27, 1651-1654,  
7 10.1029/1999gl011014, 2000.
- 8
